# Supplementary material for: Quality of Life and Associated Factors Among Adult Cancer Patients Receiving Chemotherapy at Tigray, Ethiopia 2024/25: A Mixed Study
Source: Research Square preprint supplement (doi:10.21203/rs.3.rs-8010679/v1), 2026-01-16
Supplement: Supplementary file 1 [file d232ff53cbb0bce61fdca798.docx]

## **English Version Questionnaire**

**Part one: Document review**

check list MRN______________________ Please review patient chart and record the data as follows for those options listed, please circle the options and if it is not listed put the information on the space provided.

| S.no | Items |  |
| --- | --- | --- |
| Q001 | Types of cancer | _________ |
| Q002 | Stage of cancer during diagnosis | __________ |
| Q003 | Received treatment | 1.Chemotherapy  2. Surgery and chemotherapy  3. Chemotherapy and radiotherapy |
| Q004 | Cycle of chemotherapy | . 1. 2nd cycle 2. 3rd cycle  3. 4th cycle 4.5th cycle above |
| Q005 | Time since diagnosis? | 1. Less than 12 Month 2. 1–5 years 3. above 5 years |
| Q006 | Current Hight (from card) | ---------------cm |
| Q007 | Weight (from card) | -----------kg |
| Q008 | Body mass index classification | 1.Under weight  2.Normal weight  3.Over weight |
| Q009 | Duration on chemotherapy | 1. <6monthss 2. 6months -11months 3. ≥12 months |

**Part two: Socio demographic data**

Please ask the respondents the following questions and record the responses for closed ended questions. Please circle the responses of the respondents and put the responses of the respondents for open ended and for semi- closed questions (if the response is not listed) on the space provided.

| S.no | Items |  |
| --- | --- | --- |
| Q010 | Age | ________ |
| Q011 | Sex | 1. Male 2. Female |
| Q012 | Ethnicity | 1. Tigray 2. Amhara  3. Afar 4. Other specify |
| Q013 | What is your Religion? | 1. Orthodox 2. Muslim  3. Protestant 4. Catholic  5. Other (specify) |
| Q014 | What is your marital status? | 1. Single 3. Divorced 2. Married 4. Widowed |
| Q015 | What is your occupation? | 1. Gov’t employee 4, Daily labor 2. Farmer 5. Others specify   3. House wife |
| Q016 | Educational level | 1.un able to read and write  2.able to read and write  3.primary school (1-8)  4.secondary school (9-12)  5.collage and above |
| Q018 | Where is your Residence? | 1.Rural 2. Urban |
| Q019 | Who cover cost of your drug? |  |

**Part III: Clinical and Other related factors**

| S.no | | Items | |  | | | | |
| --- | --- | --- | --- | --- | --- | --- | --- | --- |
| Q020 | | How old were you when you got cancer? | | _______________ Years old | | | | |
| Q022 | | Do you have Comorbid disease? | | 1.yes 2. No | | | | |
| Q023 | | If yes what is the disease type? | |  | | | | |
| Q024 | | When did you first start your chemotherapy? | | ___________ Years | | | | |
| Q025 | | Did you encounter any side effects of treatment? 1. Yes 2. No? | | 1.Yes 2. No | | | | |
| Q026 | | If yes for Q014 what are there? | | _______ | | | | |
| Q027 | | What services have you received as part of your care? | | 1. Pain relief  2. Psychosocial counselling  3. Spiritual care  4. Other symptom management  5, others…... | | | | |
| S.no | Items | | Scales | | Scores | | | |
| Not at all | From time to time, occasionally | A lot of the time | Most of the time |
| Q028 | I feel tense or 'wound up | | Depression | | 0 | 1 | 2 | 3 |
| Q029 | I still enjoy the things I used to enjoy: | | Depression | | 0 | 1 | 2 | 3 |
| Q030 | I get a sort of frightened feeling as if something awful is about to happen | | Depression | | 0 | 1 | 2 | 3 |
| Q031 | I can laugh and see the funny side of things: | | Depression | | 0 | 1 | 2 | 3 |
| Q032 | Worrying thoughts go through my mind: | | Depression | | 0 | 1 | 2 | 3 |
| Q033 | I feel cheerful: | | Depression | | 0 | 1 | 2 | 3 |
| Q034 | I can sit at ease and feel relaxed: | | Depression | | 0 | 1 | 2 | 3 |
| Q035 | I feel as if I am slowed down | | Anxiety | | 0 | 1 | 2 | 3 |
| Q036 | I get a sort of frightened feeling like 'butterflies' in the stomach | | Anxiety | | 0 | 1 | 2 | 3 |
| Q037 | I have lost interest in my appearance | | Anxiety | | 0 | 1 | 2 | 3 |
| Q038 | I feel restless as I have to be on the move | | Anxiety | | 0 | 1 | 2 | 3 |
| Q039 | I look forward with enjoyment to things | | Anxiety | | 0 | 1 | 2 | 3 |
| Q040 | I get sudden feelings of panic | | Anxiety | | 0 | 1 | 2 | 3 |
| Q041 | I can enjoy a good book or radio or TV program | | Anxiety | | 0 | 1 | 2 | 3 |
| Scoring: Total score: Depression ___________ Anxiety ______________  0-7 = Normal  8-10 = Borderline abnormal (borderline case)  11-21 = Abnormal (case | | | | | | | | |

**Part IV: The EROTIC, QLQ C30 version 3.0 with functional / symptom scales indicated**

| S.no | Items | scales | Scores | | | | |
| --- | --- | --- | --- | --- | --- | --- | --- |
| Not at all | A little | | Quite a bit | Very much |
| Q042 | Do you have any trouble doing strenuous activities, like carrying a heavy shopping bag or a suitcase? | Physical | 1 | 2 | | 3 | 4 |
| Q043 | Do you have any trouble taking a long walk? | Physical | 1 | 2 | | 3 | 4 |
| Q044 | Do you have any trouble take a short walk outside of the house? | Physical | 1 | 2 | | 3 | 4 |
| Q045 | Do have to stay in bed or a chair for most of the day? | Physical | 1 | 2 | | 3 | 4 |
| Q046 | Do you need help with eating, dressing, washing yourself or using the toilet? | Physical | 1 | | 2 | 3 | 4 |
| Q047 | Are you limited in any way in doing either your work or doing household jobs? | Role | 1 | | 2 | 3 | 4 |
| Q048 | Are you completely unable to work at a job or to do household jobs? | Role | 1 | | 2 | 3 | 4 |
| Q049 | Have you had difficulty in concentrating on things, like reading a newspaper or watching television? | Cognitive | 1 | | 2 | 3 | 4 |
| Q050 | Have you had difficulty remembering things? | Cognitive | 1 | | 2 | 3 | 4 |
| Q051 | Did you feel tense? | Emotional | 1 | | 2 | 3 | 4 |
| Q052 | Did you worry? | Emotional | 1 | | 2 | 3 | 4 |
| Q053 | Did you feel irritable? | Emotional | 1 | | 2 | 3 | 4 |
| Q054 | Did you feel depressed? | Emotional | 1 | | 2 | 3 | 4 |
| Q033 | Has your physical condition or medical treatment interfered with your family life? | Social | 1 | | 2 | 3 | 4 |
| Q056 | treatment interfered with your social activities? | Social | 1 | | 2 | 3 | 4 |
| Q057 | Has your physical condition or medical treatment caused you financial difficulties? | Financial Difficulties | 1 | | 2 | 3 | 4 |
| Q058 | Were you short of breath? | Dyspnea | 1 | | 2 | 3 | 4 |
| Q059 | Have you had pain? | Pain | 1 | | 2 | 3 | 4 |
| Q060 | Did you need rest? | Fatigue | 1 | | 2 | 3 | 4 |
| Q061 | Have you had trouble sleeping? | Insomnia | 1 | | 2 | 3 | 4 |
| Q062 | Have you felt weak? | Fatigue | 1 | | 2 | 3 | 4 |
| Q063 | Have you lacked appetite? | Appetite loss | 1 | | 2 | 3 | 4 |
| Q064 | Have you felt nauseated? | Nausea and Vomiting | 1 | | 2 | 3 | 4 |
| Q065 | Have you vomited? | Nausea and Vomiting | 1 | | 2 | 3 | 4 |
| Q066 | Have you been constipated? | Constipation n | 1 | | 2 | 3 | 4 |
| Q067 | Have you had diarrhea? | Diarrhea | 1 | | 2 | 3 | 4 |
| Q068 | Were you tired? | Fatigue | 1 | | 2 | 3 | 4 |
| Q069 | Did pain interfere with you daily activities? | Pain | 1 | | 2 | 3 | 4 |

Global health status

| s.no | Items | Scales | | | | | | |
| --- | --- | --- | --- | --- | --- | --- | --- | --- |
| v.poor |  |  |  |  |  | Excellent |
| Q070 | How would you rate your overall physical condition during the past week? | 1 | 2 | 3 | 4 | 5 | 6 | 7 |
| Q071 | How would you rate your overall quality of life during the past week? | 1 | 2 | 3 | 4 | 5 | 6 | 7 |

## **Interview guide question and Consent form**

**VERBAL CONSENT FORM**

My name is ____________________________and I am a post-graduate student at Aksum University, College of Health Sciences, and School of Nursing. I would like to talk to you about quality of life and Associated Factors among cancer patients receiving chemotherapy in Tigray, Ethiopia. The interview will take 30-40 minute. I will be audiotaping the session because I don’t want to miss any of your ideas. You have the right to withdraw from participating in this study at any time. All aspects of the study including the results will be strictly confidential, and only the researcher and supervisors will have access to information on participants. Participants de-identified by name. However, every effort will be made to condense this. To maintain confidentiality, codes will be used in the results and publications. In addition to this I would like to inform you that there is no direct benefit and risk for you by participating in this study. Are there any questions about what I have just explained? Are you willing to participate in this interview?

**WRITTEN CONSENT FORM**

I have been informed that the objective of this study is to assess quality of life and associated factors among cancer patients in Tigray, Ethiopia 2024/25. I understand that there is no risk and no incentives will be given upon participation in this study. Therefore, I am willing to participate in the study.

signature________________________ Date__________________________

**Name of the principal investigator: Haileslasie : Hailemariam**

Address: Tel: +251-938192941 Email: haileslasiehailemariam27@gmail.com

**General information of participants**

| Code of participants |  |
| --- | --- |
| Sex |  |
| Age |  |
| Educational level |  |
| Occupation |  |
| Type of cancer |  |
| Stage of cancer |  |
| Cycle of chemotherapy |  |
| Hospital |  |

## Interview Guide Questions with cancer patients under chemotherapy

Question 1. How do you understand about your disease*?*  Probe-- Can you tell me your experience ……...? Probe? Can you tell me your experience about your chemotherapy treatment ……...?

3.In your opinion, what are the barriers (negative or positive) that affect your quality of life during receiving chemotherapy? Probe—can chemotherapy affected your physical health and daily activities? Probe- How do you feel emotionally during your treatment? Probe- How have your relationships with family and friends changed since starting chemotherapy?

Is there anything that you would like to mention that has not been covered?

Finally, I would like to express thanks for your voluntary participation in this in-depth interview.

You have contributed your best!

Thanks
